# Supplementary material for: Wavenumber–intensity joint SERS encoding using silver nanoparticles for tumor cell targeting
Source: Royal Society of Chemistry journal article supplement (doi:10.1039/c4ra11522h), 2014-01-01
Supplement: c4ra11522h1.pdf [file c4ra11522h1.pdf]

## Electronic supplementary information

# Wavenumber-Intensity Joint SERS Encoding Using Silver Nanoparticles for Tumor Cell Targeting

Dan Zhu,<sup>a</sup> Zhuyuan Wang,<sup>\*a</sup> Shenfei Zong,<sup>a</sup> Hui Chen,<sup>a</sup> Peng Chen,<sup>a</sup> Yiping Cui<sup>\*a</sup>

[cyp@seu.edu.cn](mailto:cyp@seu.edu.cn), [wangzy@seu.edu.cn](mailto:wangzy@seu.edu.cn)

Advanced photonics center, Southeast University, Nanjing 210096, China

**Table S1.** Amounts of BDT, 2-NAT and 4-MT used for SERS encoded Ag NPs.

|             |       |       |       |        |       |       |       |        |       |       |
|-------------|-------|-------|-------|--------|-------|-------|-------|--------|-------|-------|
| No.         | 1     | 2     | 3     | 4      | 5     | 6     | 7     | 8      | 9     | 10    |
| code        | 100   | 010   | 001   | 101    | 102   | 201   | 110   | 120    | 210   | 011   |
| molar ratio | 1:0:0 | 0:1:0 | 0:0:1 | 5:0:3  | 4:0:5 | 5:0:2 | 5:2:0 | 5:3:0  | 5:1:0 | 0:2:5 |
|             |       |       |       |        |       |       |       |        |       |       |
| No.         | 11    | 12    | 13    | 14     | 15    | 16    | 17    | 18     | 19    |       |
| code        | 012   | 021   | 111   | 112    | 121   | 211   | 122   | 212    | 221   |       |
| molar ratio | 0:1:7 | 0:3:5 | 4:3:5 | 4:3:11 | 2:6:5 | 6:3:5 | 1:3:5 | 6:3:11 | 4:6:5 |       |

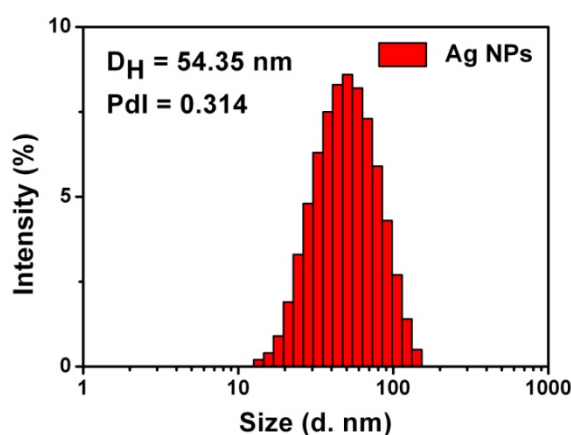

**Figure S1.** Hydrodynamic size of silver nanoparticles (Ag NPs) measured by dynamic light scattering (DLS).

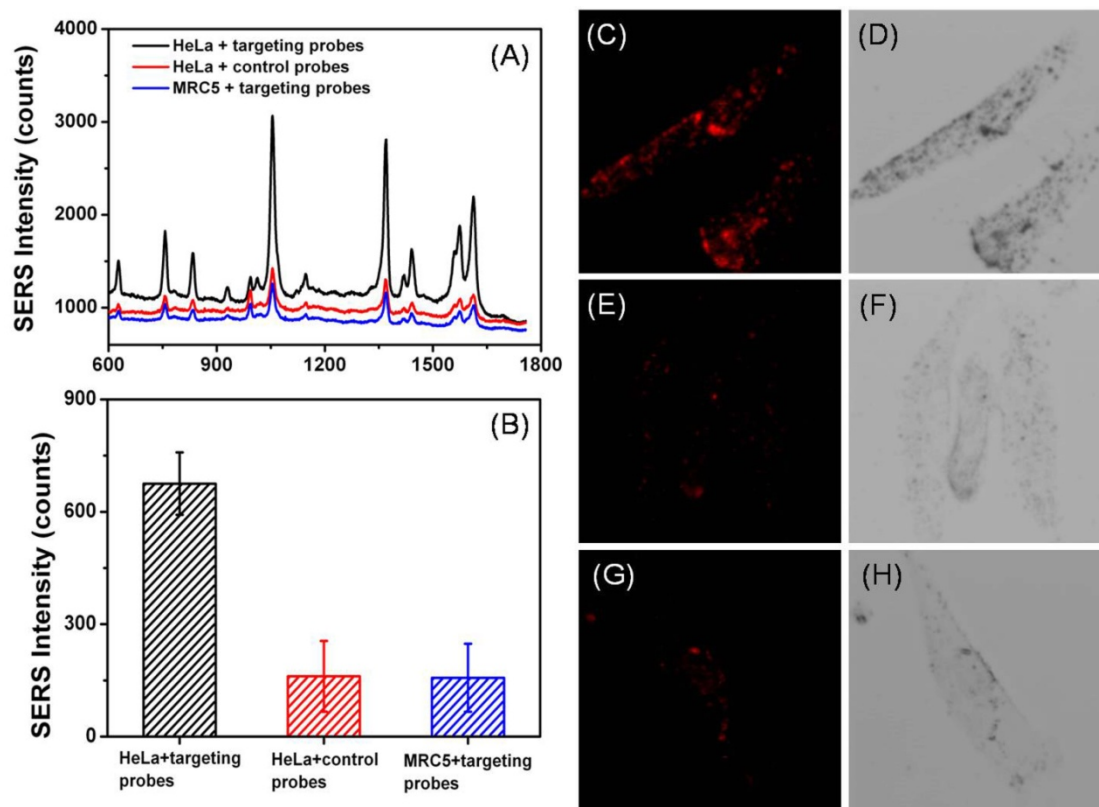

**Figure S2.** (A) SERS spectra of the nanoprobe in living cells under different conditions; for each situation, the SERS spectra were collected from 10 randomly selected cells and average results were presented; (B) SERS intensities of the bands at  $767\text{ cm}^{-1}$  correspond to the Figure S2A, the error bars represent the standard deviation of 10 measurements; (C, D) SERS mapping of HeLa cells incubated with the targeting probe; (E, F) SERS mapping of HeLa cells incubated with the transferrin free probe; (G, H) SERS mapping of MRC5 cells incubated with the targeting probe.
